# Supplementary material for: Significantly enhancing the solar fuel production rate and catalytic durability for photothermocatalytic CO2 reduction by a synergetic effect between Pt and Co doped Al2O3 nanosheets
Source: Royal Society of Chemistry journal article supplement (doi:10.1039/d2ta00211f), 2022-01-01
Supplement: d2ta00211f1.pdf [file d2ta00211f1.pdf]

### Supporting Information

#### Significantly enhancing solar fuel production rate and catalytic durability for photothermocatalytic CO<sub>2</sub> reduction by a synergetic effect between Pt and Co-doped Al<sub>2</sub>O<sub>3</sub> nanosheets

Zhenghai Xie, Yuanzhi Li,\* Zhiyuan Zhou, Qianqian Hu, Jichun Wu, Shaowen Wu

State Key Laboratory of Silicate Materials for Architectures, Wuhan University of Technology, 122 Luoshi Road, Wuhan 430070, P. R. China.

### Experimental

The thermodynamic maximum  $\eta_{\max}$  for the present photothermocatalytic CRM is determined by both solar absorption efficiency and Carnot efficiency in according to the following equation.<sup>46,50</sup>

$$\eta_{\max} = [1 - \sigma \times T_H^4 / (I_{\text{DNI}} \times C)] \times [1 - T_L / T_H]$$

Where  $\sigma$  is Stefan–Boltzmann constant,  $I_{\text{DNI}}$  is the direct normal solar irradiation (1 kWm<sup>-2</sup>),  $C$  is the solar flux concentration ratio,  $T_L$  and  $T_H$  are the low and high temperatures of the equal Carnot heat engine.

For the photothermocatalytic CRM on Pt/Co-Al<sub>2</sub>O<sub>3</sub>,  $C$  is equal to 343.0. Focused UV-Vis-IR irradiation causes the surface temperature of Pt/Co-Al<sub>2</sub>O<sub>3</sub> to be quickly raised to an equilibrium temperature of 666 °C ( $T_H = 939.15$  K) from room temperature ( $T_L = 298.15$  K). Thus,  $\eta_{\max}$  is calculated to be 59.5%.

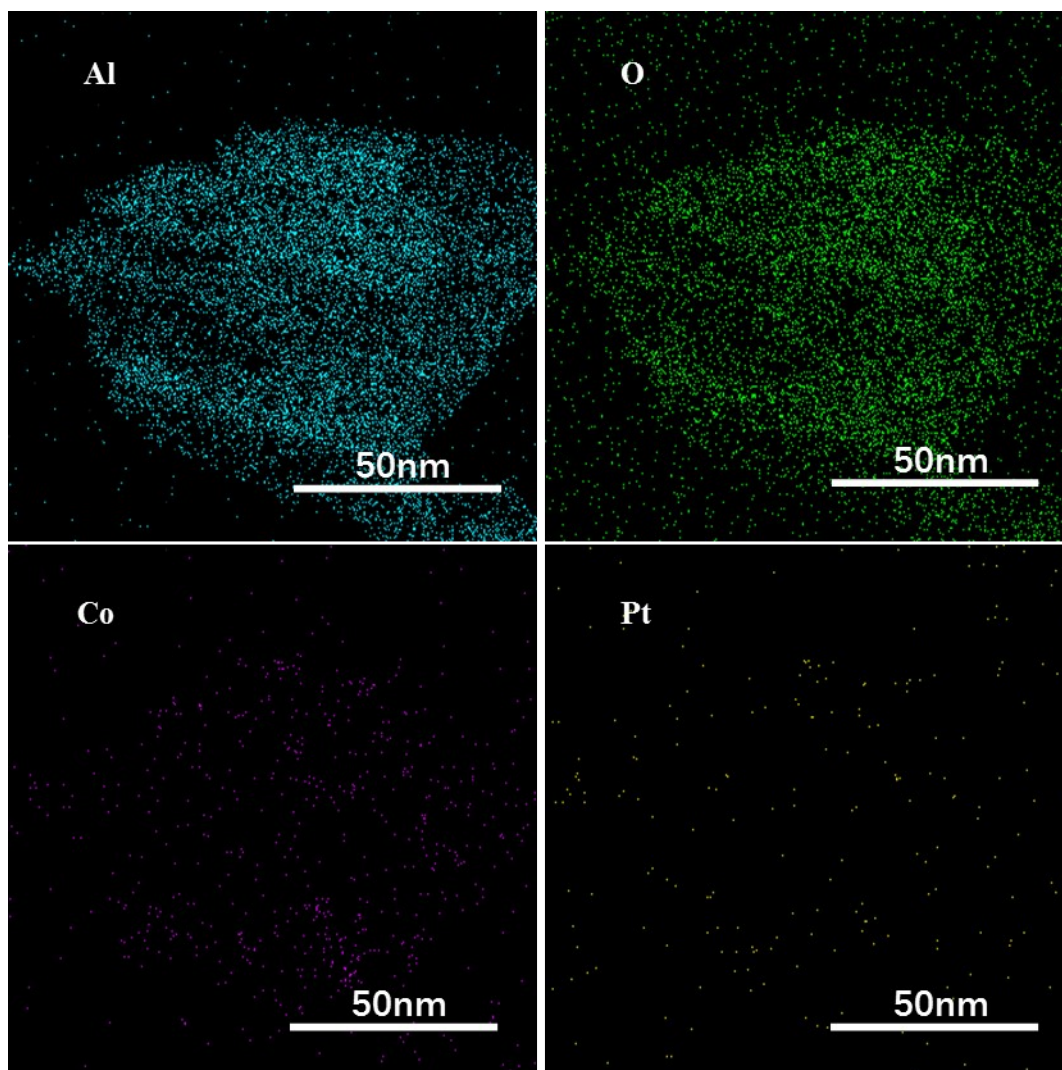

Figure S1. EDS mappings of Al, O, Co, and Pt for Pt/Co-Al<sub>2</sub>O<sub>3</sub>.

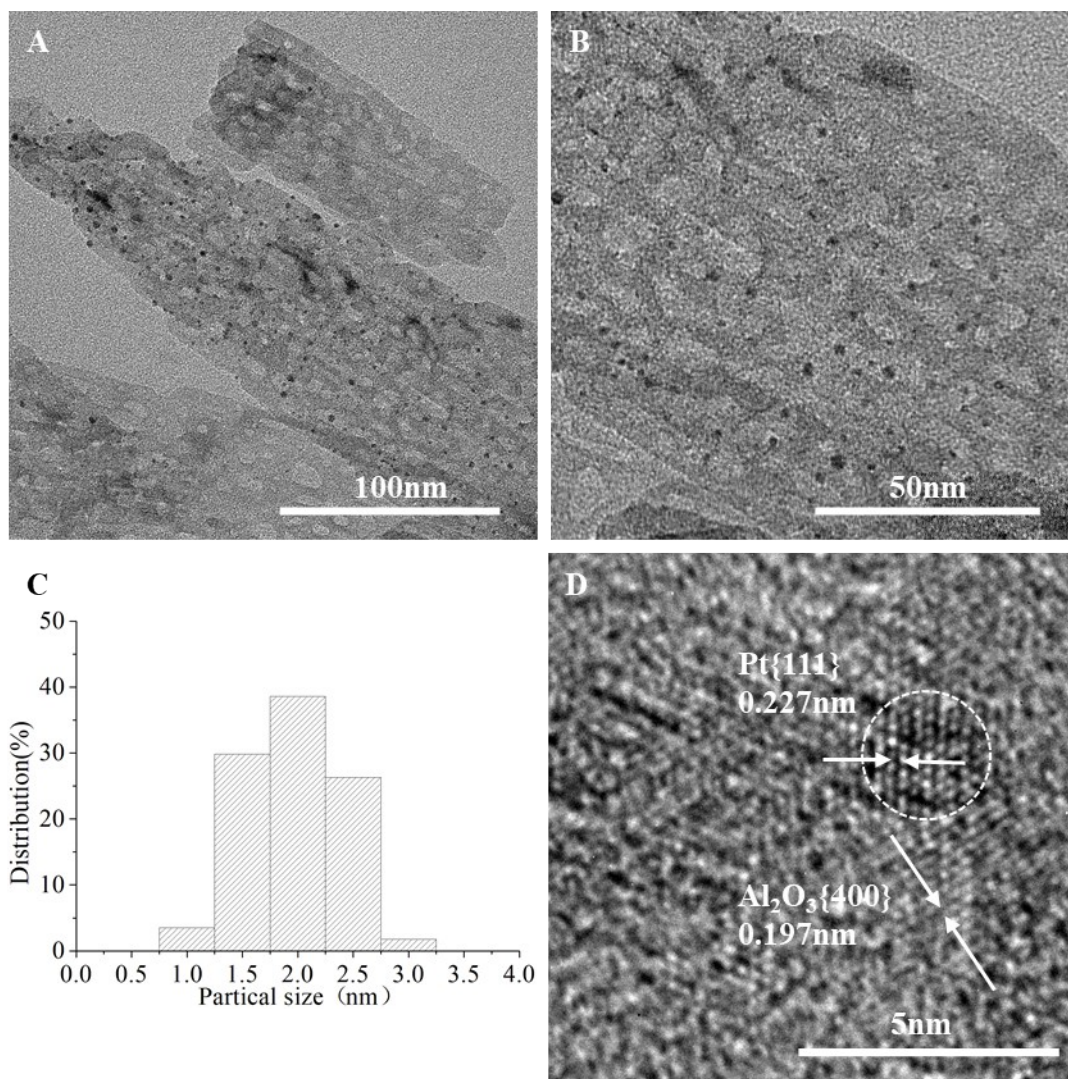

**Figure S2.** TEM images with lower and higher resolution (A, B), the size distribution of Pt nanoparticles (C), HRTEM image (D) of Pt/Al<sub>2</sub>O<sub>3</sub>.

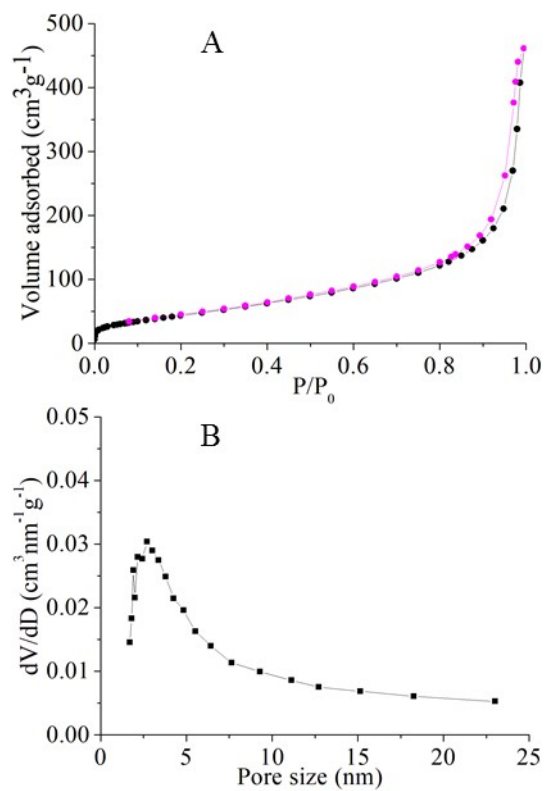

**Figure S3.** N<sub>2</sub> adsorption-desorption isotherms (A) and BJH adsorption pore size distribution (B) of Pt/Co-Al<sub>2</sub>O<sub>3</sub>.

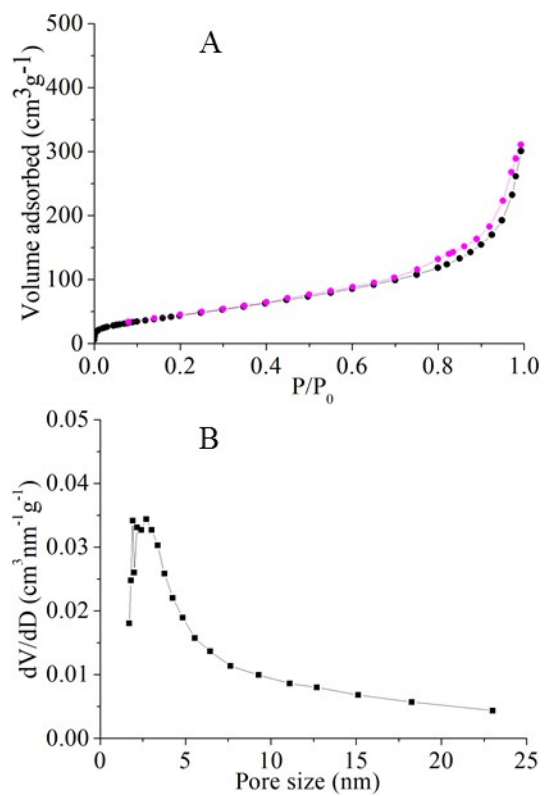

**Figure S4.** N<sub>2</sub> adsorption-desorption isotherms (A) and BJH adsorption pore size distribution (B) of Pt/Al<sub>2</sub>O<sub>3</sub>.

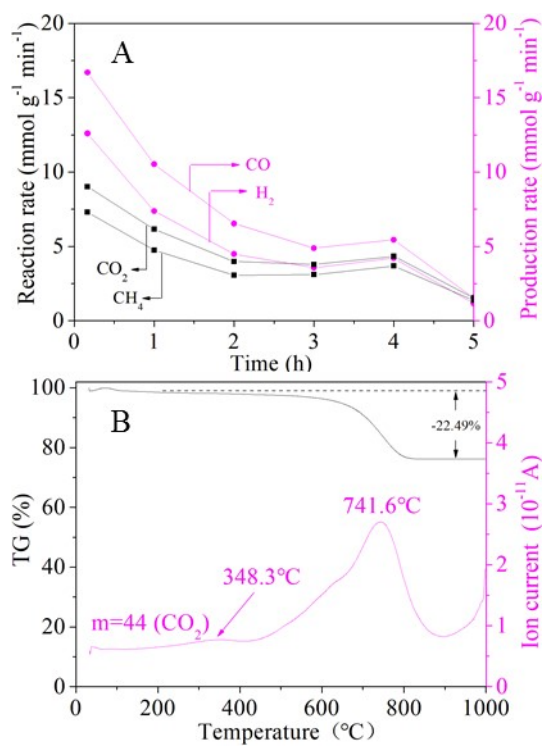

**Figure S5.** Time course of reaction rates for photothermocatalytic CRM on Pt/Al<sub>2</sub>O<sub>3</sub> under focused UV-vis-IR irradiation (A). TG-MS profiles of the used Pt/Al<sub>2</sub>O<sub>3</sub> sample after 5 h photothermocatalytic durability test (B).

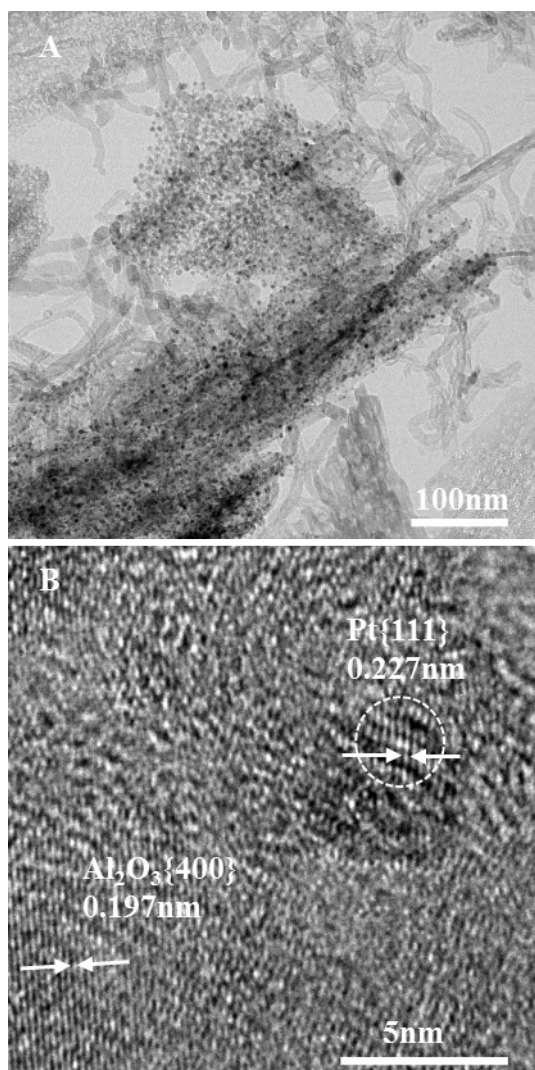

**Figure S6.** TEM (A) and HRTEM (B) images of the used Pt/Co-Al<sub>2</sub>O<sub>3</sub> sample after 50 h photothermocatalytic test.

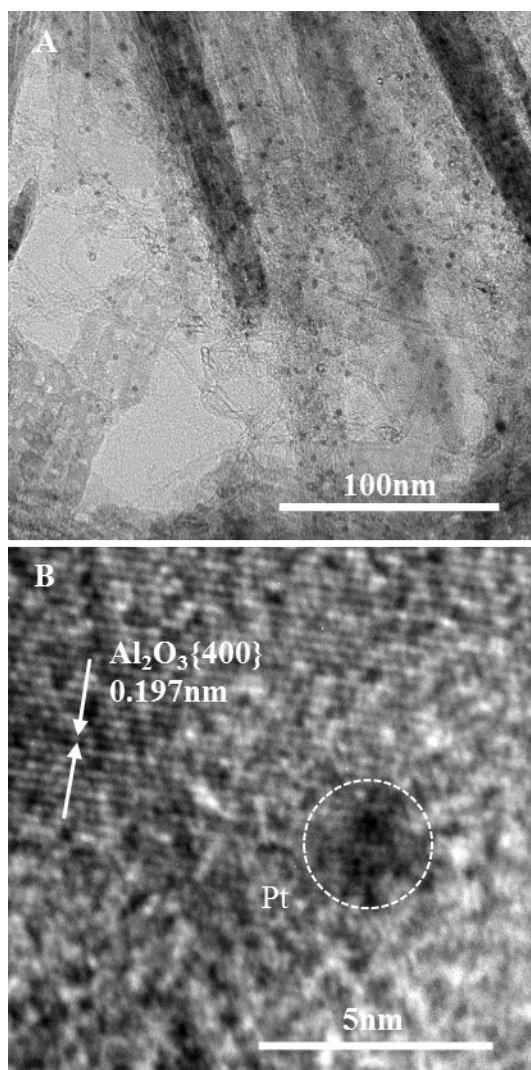

**Figure S7.** TEM (A) and HRTEM (B) images of the used Pt/Al<sub>2</sub>O<sub>3</sub> sample after 5 h photothermocatalytic durability test.
